# Supplementary material for: Campylobacter infection and household factors are associated with childhood growth in urban Bangladesh: An analysis of the MAL-ED study
Source: PubMed Central journal article supplement (PMC7252635; doi:10.1371/journal.pntd.0008328), 2020-05-14
Supplement: pntd.0008328.s001.pdf [file pntd.0008328.s001.pdf]

**S1 Table. Prevalence of enteric pathogens across age intervals**

| <b>Pathogen</b>        | <b>1 month*<br/>N (%)</b> | <b>3 months<br/>N (%)</b> | <b>6 months<br/>N (%)</b> | <b>9 months<br/>N (%)</b> | <b>12 months<br/>N (%)</b> | <b>15 months<br/>N (%)</b> | <b>18 months<br/>N (%)</b> | <b>21 months<br/>N (%)</b> | <b>24 months<br/>N (%)</b> |
|------------------------|---------------------------|---------------------------|---------------------------|---------------------------|----------------------------|----------------------------|----------------------------|----------------------------|----------------------------|
| <b>Campylobacter</b>   | 20 (8.00)                 | 41 (17.75)                | 41 (17.75)                | 106 (49.30)               | 124 (61.39)                | 120 (59.11)                | 145 (73.23)                | 142 (72.08)                | 133 (68.91)                |
| <b>Cryptosporidium</b> | 16 (6.40)                 | 2 (0.87)                  | 3 (1.38)                  | 5 (2.33)                  | 7(3.47)                    | 4 (1.97)                   | 10 (5.05)                  | 9 (4.47)                   | 4 (2.07)                   |
| <b>Astrovirus</b>      | 6 (2.40)                  | 4 (1.73)                  | 10 (4.61)                 | 7 (3.26)                  | 6 (2.97)                   | 2 (0.99)                   | 7 (3.54)                   | 7 (3.55)                   | 11 (5.70)                  |
| <b>EPEC</b>            | 2 (0.8)                   | 3 (1.30)                  | 15 (6.91)                 | 28 (13.02)                | 17 (8.42)                  | 14 (6.90)                  | 8 (4.04)                   | 5 (2.54)                   | 4 (2.07)                   |
| <b>Giardia</b>         | 0                         | 1 (0.43)                  | 1 (0.46)                  | 6 (2.79)                  | 13 (6.44)                  | 16 (7.88)                  | 28 (14.14)                 | 28 (14.21)                 | 29 (15.03)                 |
| <b>Ascaris</b>         | 0                         | 0                         | 1 (0.46)                  | 3 (1.40)                  | 5 (2.48)                   | 11 (5.42)                  | 18 (9.09)                  | 14 (7.11)                  | 15 (7.77)                  |
